# Supplementary material for: The lysine‐specific methyltransferase KMT2C/MLL3 regulates DNA repair components in cancer
Source: PubMed Central journal article supplement (PMC6399616; doi:10.15252/embr.201846821), 2019-01-21

Figure 2

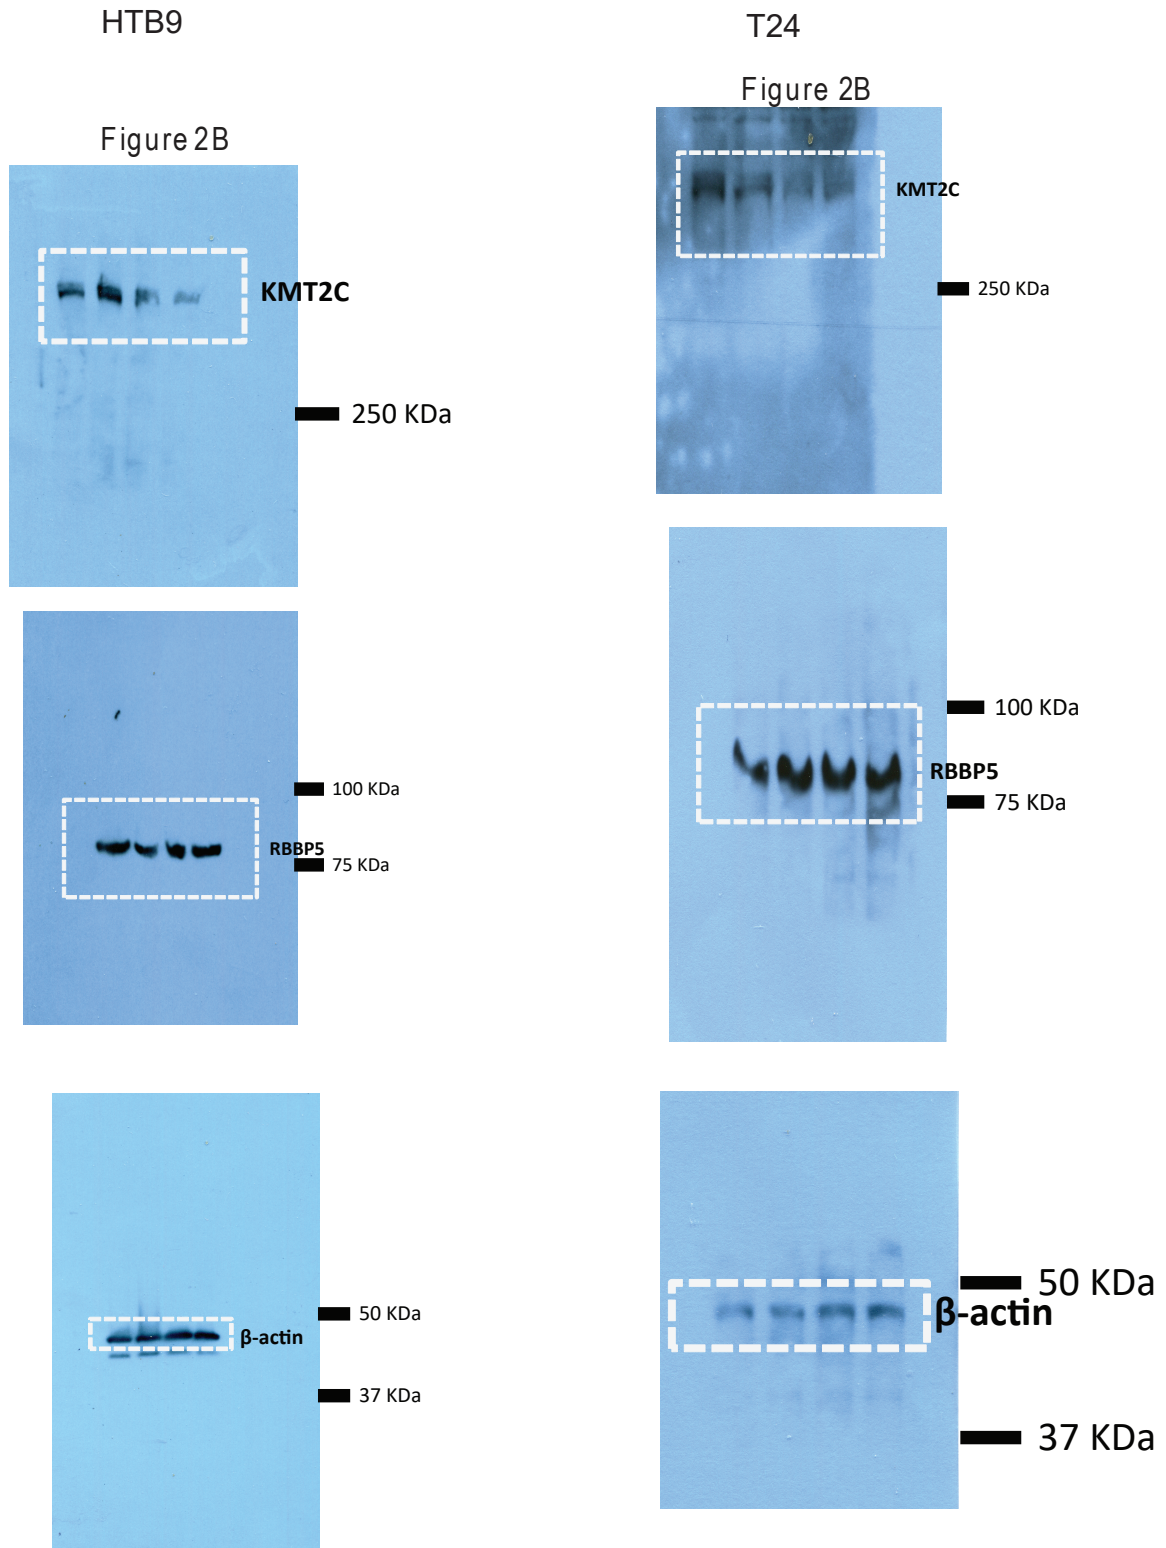

Supplement: EMBR-20-e46821-s006.pdf [file EMBR-20-e46821-s006.pdf]
